# Supplementary material
Source: PubMed Central journal article supplement (PMC7674056)
Supplement: AAC.00654-20-s0001.pdf [file AAC.00654-20-s0001.pdf]

**SUPPLEMENTAL MATERIAL** – *Ratna et al*

**FIG S1-** Intracellular triphosphate levels measured by LC-MS/MS upon prodrug removal. Error bars represent SD (n = 3 replicates). Prodrug **12** was first incubated in human PBMCs at 100  $\mu\text{M}$  for 24 hours. Then media was replaced with a fresh one without compound (time = 0 hour). Subsequently, time-points were taken up to 48 hours. Half-life was calculated to be 5.5 hours.

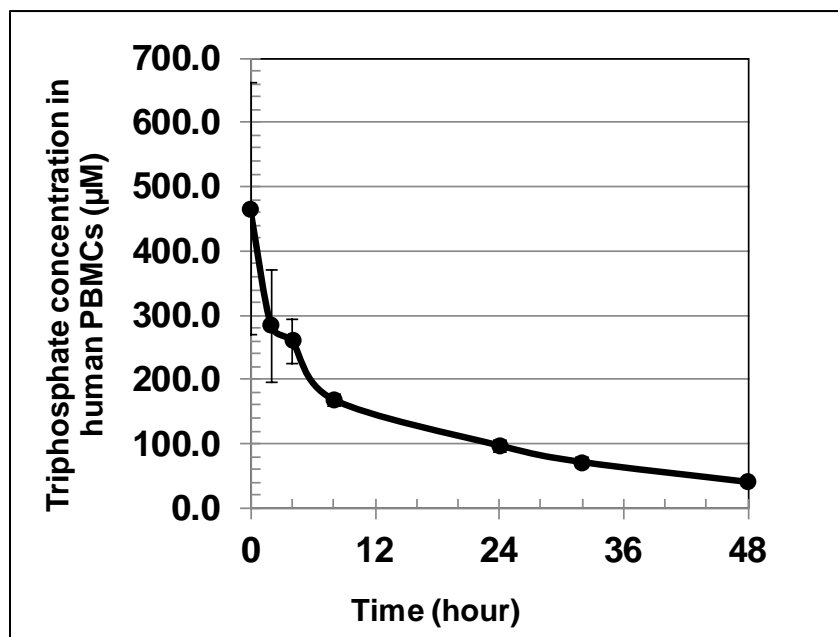

**Nucleoside 7**

|                   | Unit     | Day | 10 mg/kg<br>BID | 30 mg/kg<br>BID | 100<br>mg/kg<br>BID | 300<br>mg/kg<br>BID |
|-------------------|----------|-----|-----------------|-----------------|---------------------|---------------------|
| C <sub>max</sub>  | μM       | 1   | 0.3             | 0.9             | 2.5                 | 1.9                 |
|                   |          | 3   | 0.3             | 0.8             | 1.4                 | 2.4                 |
| AUC <sub>24</sub> | μM.hours | 1   | 2.6             | 7.4             | 22.9                | 24.4                |
|                   |          | 3   | 3.2             | 8.6             | 19.4                | 29.6                |

**TABLE S1-** Pharmacokinetic parameters of metabolite 7 upon oral dosing of compound 17 in the infected AG129 mouse model. The intact prodrug was not detected in plasma. Major metabolite nucleoside 7 was monitored in plasma of 3 mice. PK parameters (C<sub>max</sub>, AUC<sub>24</sub>) was obtained from the samples at 1, 3, 6, 24 hours post-1st-dose (day 1) and 50, 52, 55, 72 hours post 1st-dose (day 3). See Fig 6A for dosing scheme and sampling schedule. C<sub>max</sub> = maximum plasma concentration. AUC<sub>24</sub> = area under the curve observed for 24 hours on the study day.

|                     | Unit     | Solution | Nanosuspension | Solid dispersion |
|---------------------|----------|----------|----------------|------------------|
| C <sub>max</sub>    | μM       | 5.5      | 0.9            | 16.4             |
| T <sub>max</sub>    | hours    | 0.58     | 0.8            | 0.25             |
| AUC <sub>last</sub> | μM.hours | 4.4      | 1.5            | 12.2             |
| F                   | %        | 24       | 8.5            | 68               |

**Table S2-** Pharmacokinetic parameters of compound 17 dosed orally at 15 mg/kg in different formulation to beagle dogs (n=3). Solution and solid dispersion formulation as described in Material and Methods section. Nanosuspension formulation used 1% hydroxypropyl methylcellulose and 0.2% sodium dodecyl sulfate. Intact prodrug was measured in plasma by LC-MS/MS. C<sub>max</sub> = maximum plasma concentration. T<sub>max</sub> = time to reach maximum concentration. AUC<sub>last</sub> = area under the curve (t=0 till the last measurable concentration), F = oral bioavailability. Solid dispersion formulation showed the highest oral bioavailability.

|                   | Unit     | 30 mg/kg/day |      | 100 mg/kg/day | 300 mg/kg/day |
|-------------------|----------|--------------|------|---------------|---------------|
| Study day         |          | 1            | 14   | 1             | 1             |
| C <sub>24</sub>   | μM       | 24           | 50   | 100           | 73            |
| C <sub>max</sub>  | μM       | 73           | 98   | 140           | 150           |
| AUC <sub>24</sub> | μM.hours | 1050         | 1558 | 2399          | 2387          |

**Table S3-** PBMC triphosphate concentration obtained from two-week repeat-dosing toxicology studies in dogs (n = 3 females and 3 males). Compound 17 was dosed orally at 30, 100, and 300 mg/kg/day for 14 days. C<sub>24</sub> = concentration observed at 24 hours on the study day. C<sub>max</sub> = maximum plasma concentration. AUC<sub>24</sub> = area under the curve observed for 24 hours on the study day.
